# Supplementary material
Source: PubMed Central journal article supplement (PMC4696570)
Supplement: ASN.2014101030_ASN2014101030SupplementaryData.pdf [file ASN.2014101030_ASN2014101030SupplementaryData.pdf]

## Supplementary information

### Renal Production, Uptake, and Handling of Circulating $\alpha$ Klotho

Ming-Chang Hu<sup>1,4,\*</sup>, Mingjun Shi<sup>4</sup>, Jianning Zhang<sup>1</sup>, Tayo Addo<sup>1</sup>, Han Ju Cho<sup>4</sup>, Sarah Barker<sup>5</sup>, Priya Ravikumar<sup>1,4</sup>, Nancy Gillings<sup>4</sup>, Ao Bian<sup>4</sup>, Sachdev S. Sidhu<sup>5</sup>, Makoto Kuro-o<sup>3,4</sup>, Orson W. Moe<sup>1,2,4,\*</sup>.

Departments of Internal Medicine<sup>1</sup>, Physiology<sup>2</sup> and Pathology<sup>3</sup>,  
Charles and Jane Pak Center of Mineral Metabolism and Clinical Research<sup>4</sup>  
University of Texas Southwestern Medical Center, Dallas TX, USA  
Banting and Best Department of Medical Research and Department of Molecular Genetics,  
The Donnelly Centre, University of Toronto, Toronto, Ontario, Canada<sup>5</sup>

Running title: Kidney Handling of  $\alpha$ Klotho

The current affiliation for A.B. is Department of Internal Medicine, Division of Nephrology, First Affiliated Hospital of Nanjing Medical University, Nanjing, Jiangsu, China. M.K. holds a joint appointment in the Center for Molecular Medicine in Jichi Medical University, Tochigi, Japan.

\*Correspondence:

MC Hu ([ming-chang.hu@utsouthwestern.edu](mailto:ming-chang.hu@utsouthwestern.edu), 1-214-648-9797)

or

OW Moe ([orson.moe@utsouthwestern.edu](mailto:orson.moe@utsouthwestern.edu), 1-214-648-0779)

Charles and Jane Pak Center of Mineral Metabolism and Clinical Research  
Department of Internal Medicine  
University of Texas Southwestern Medical Center  
5323 Harry Hines Blvd.  
Dallas, TX 75390-8885  
USA

**Supplementary Table 1: Demography of humans underwent right heart catheterization**

| Case | Age (yr) | Sex | Race | Ethnicity | Reason for Catheterization | Co-morbidity                     | Medications                                                    | Serum Pi mg/dl (mM) | Serum Ca mg/dl (mM) |
|------|----------|-----|------|-----------|----------------------------|----------------------------------|----------------------------------------------------------------|---------------------|---------------------|
| 1    | 60       | F   | B    | NH        | CHF                        | HTN                              | Nitrate, $\alpha/\beta$ blocker, ACEI, NSAID                   | 3.0 (0.96)          | 8.6 (2.2)           |
| 2    | 46       | F   | W    | H         | Mitral stenosis            | Pulmonary congestion             | NSAID                                                          | 2.9 (0.94)          | 9.0 (2.3)           |
| 3    | 45       | F   | B    | NH        | Aortic stenosis, CHF       | CHD, HTN                         | Estrogen, ACEI, iron, Ca and Vitamin D                         | 2.0 (0.64)          | 8.6 (2.2)           |
| 4    | 50       | F   | W    | H         | Cardiomyopathy             | CAD, DM                          | $\alpha/\beta$ blocker, ACEI, Insulin, Statin, NSAID,          | 4.0 (1.3)           | 8.2 (2.1)           |
| 5    | 43       | M   | B    | NH        | CHF                        | HTN, ashma                       | Spironolactone, ACEI, $\beta$ agonist inhaler                  | 4.1 (1.3)           | 9.7 (2.4)           |
| 6    | 56       | F   | B    | NH        | PAH                        | Lupus                            | Prednisone                                                     | 3.5 (1.1)           | 9.2 (2.3)           |
| 7    | 53       | F   | B    | NH        | PAH                        | HTN, ashma, hypercholesterolemia | $\alpha$ blocker, ACEI, Tricor, NSAID, $\beta$ agonist inhaler | 3.8 (1.2)           | 8.0 (2.0)           |
| 8    | 43       | F   | W    | NH        | PAH                        |                                  |                                                                | 3.8 (1.2)           | 8.0 (2.0)           |
| 9    | 45       | F   | W    | NH        | PAH                        |                                  |                                                                | 4.9 (1.6)           | 8.8 (2.2)           |

ACEI: angiotensin converting enzyme inhibitor; Ca: serum calcium; CAD: coronary artery disease, CHD: congenic heart defect/CHF: Congestion heart failure; DM: diabetes mellitus; H: Hispanic; HTN: hypertension; NH: non-hispanic; NSAID: non-steroidal anti-inflammatory drug; Pi: serum phosphate; PAH: Pulomary arterial hypertension; yr: year

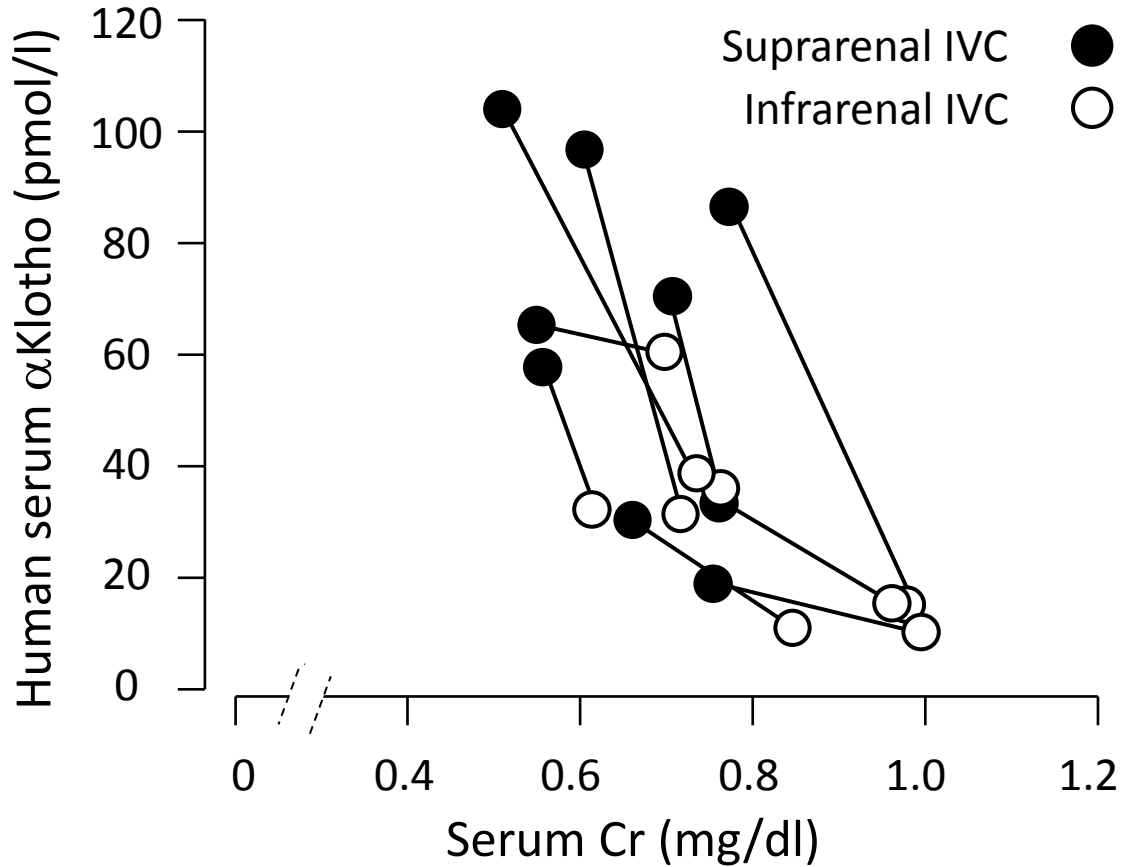

**Supplementary Figure 1. Serum αKlotho and serum creatinine in the same samples from human suprarenal and infrarenal inferior vena cava (IVC).**  
The lines join samples from the same subject.

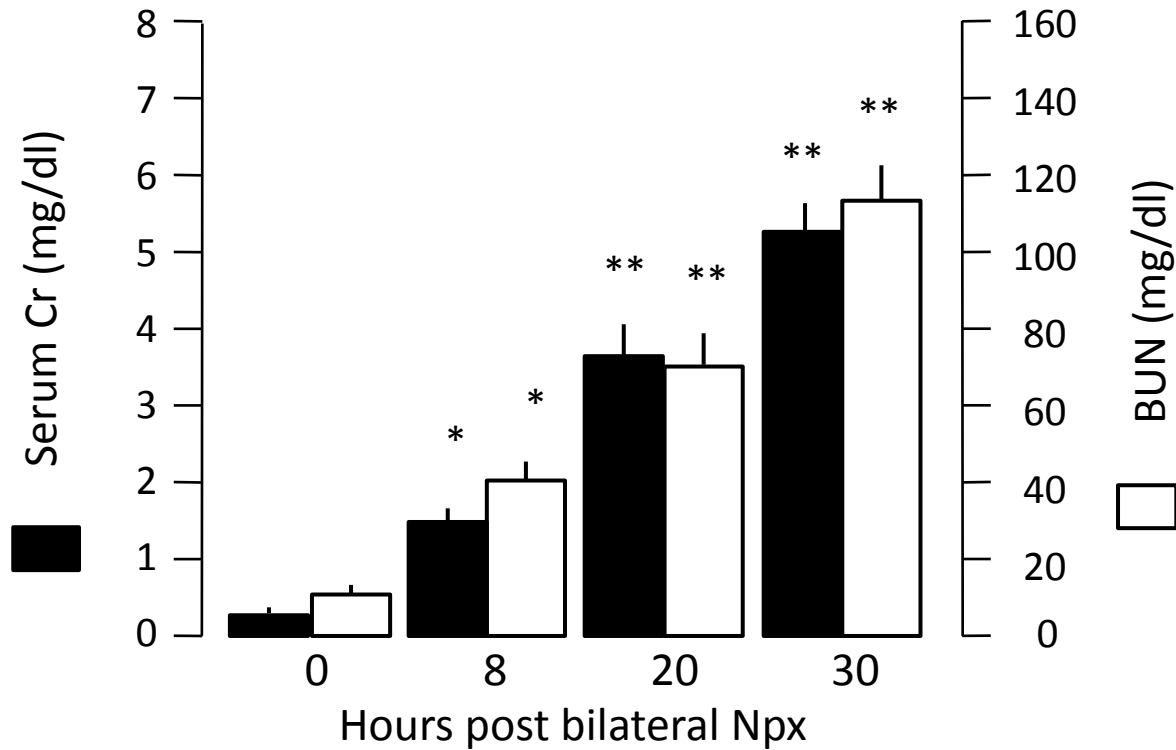

**Supplementary Figure 2. Serum creatinine and BUN in anephric rats.** Normal SD rats underwent bilateral nephrectomy and blood was drawn at the specified time points post-nephrectomy. Summary of serum creatinine (Cr) and blood urea nitrogen (BUN) from 3 independent experiments. Data is expressed as means  $\pm$  SD. Statistical significance was assessed by ANOVA followed by Student-Newman-Keuls test, and significant differences were accepted when  $P < 0.05^*$ ;  $P < 0.01^{**}$  vs. 0 hour. BUN: Blood urea nitrogen; Cr: Creatinine.

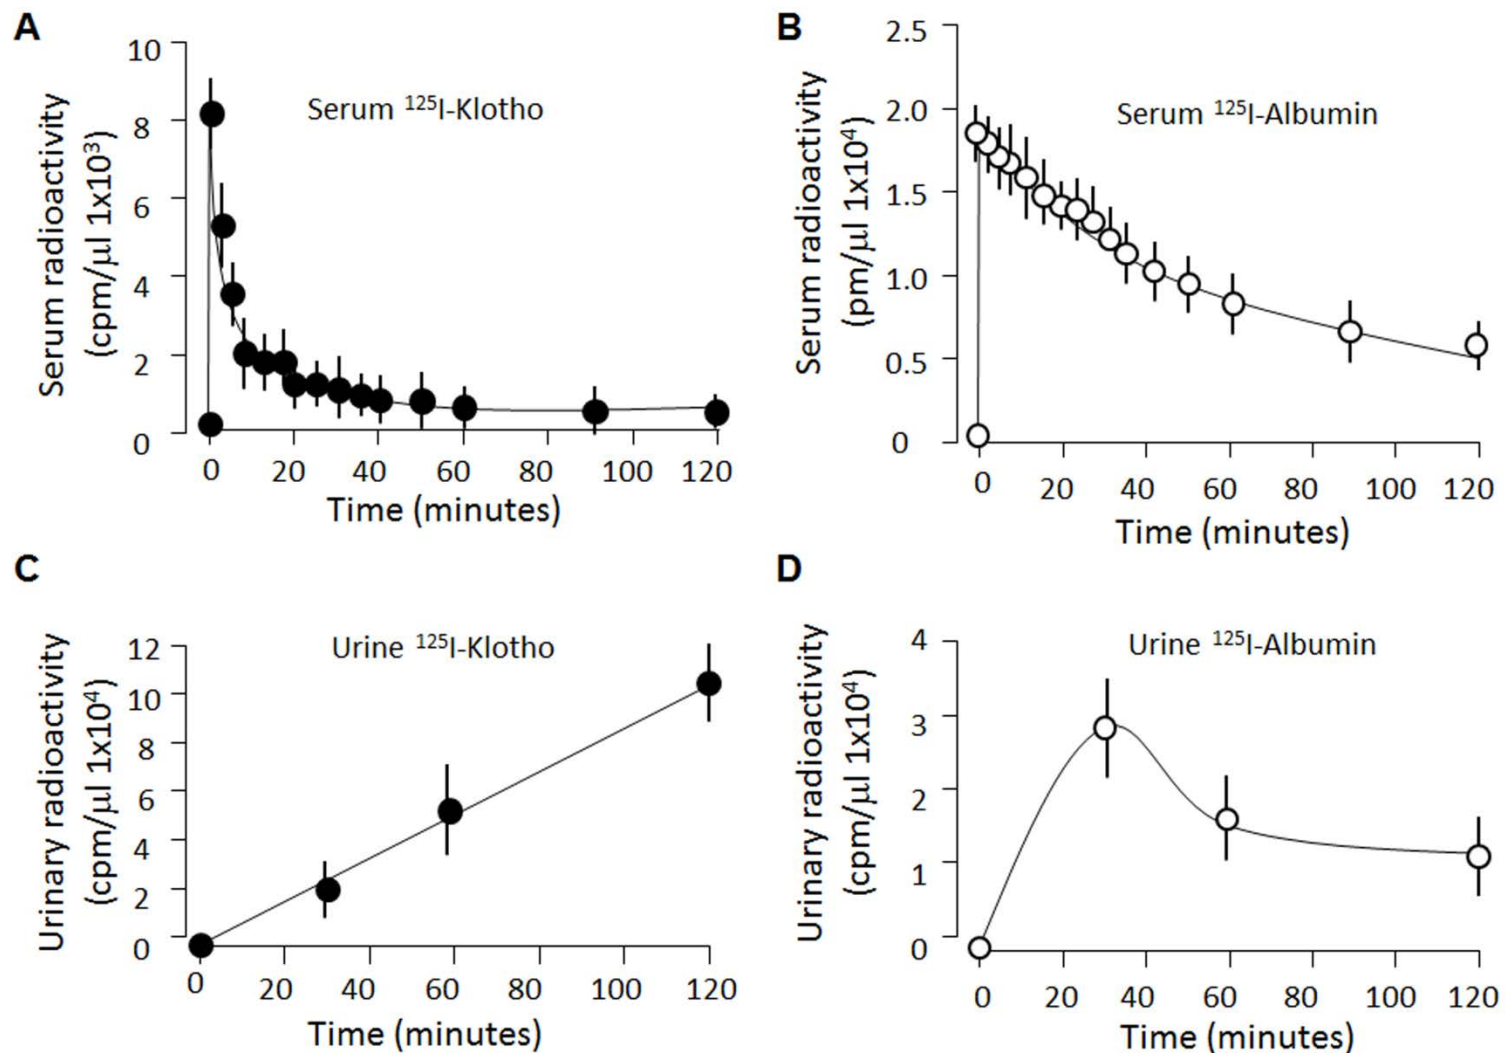

**Supplementary Figure 3. Blood and urine  $^{125}\text{I}$ -labeled  $\alpha\text{Klotho}$  and albumin clearance in *WT* mice.** (A and B)  $^{125}\text{I}$ -labeled  $\alpha\text{Klotho}$  was intravenously injected into normal rats and blood and urine were collected at specific time point up to 2 hours post injection. (A) Radioactivity of  $^{125}\text{I}$ - $\alpha\text{Klotho}$  in serum was quantified and plotted against time. (B) Radioactivity of  $^{125}\text{I}$ - $\alpha\text{Klotho}$  in urine was quantified and plotted against time. (C and D)  $^{125}\text{I}$ -labeled albumin was intravenously injected into normal rats and blood and urine were collected at specific time point up to 2 hours post injection. (C) Radioactivity of  $^{125}\text{I}$ -albumin in serum was quantified and plotted against time. (D) Radioactivity of  $^{125}\text{I}$ -albumin in urine was quantified and plotted against time. Circles and error bars represent mean  $\pm$  SD.

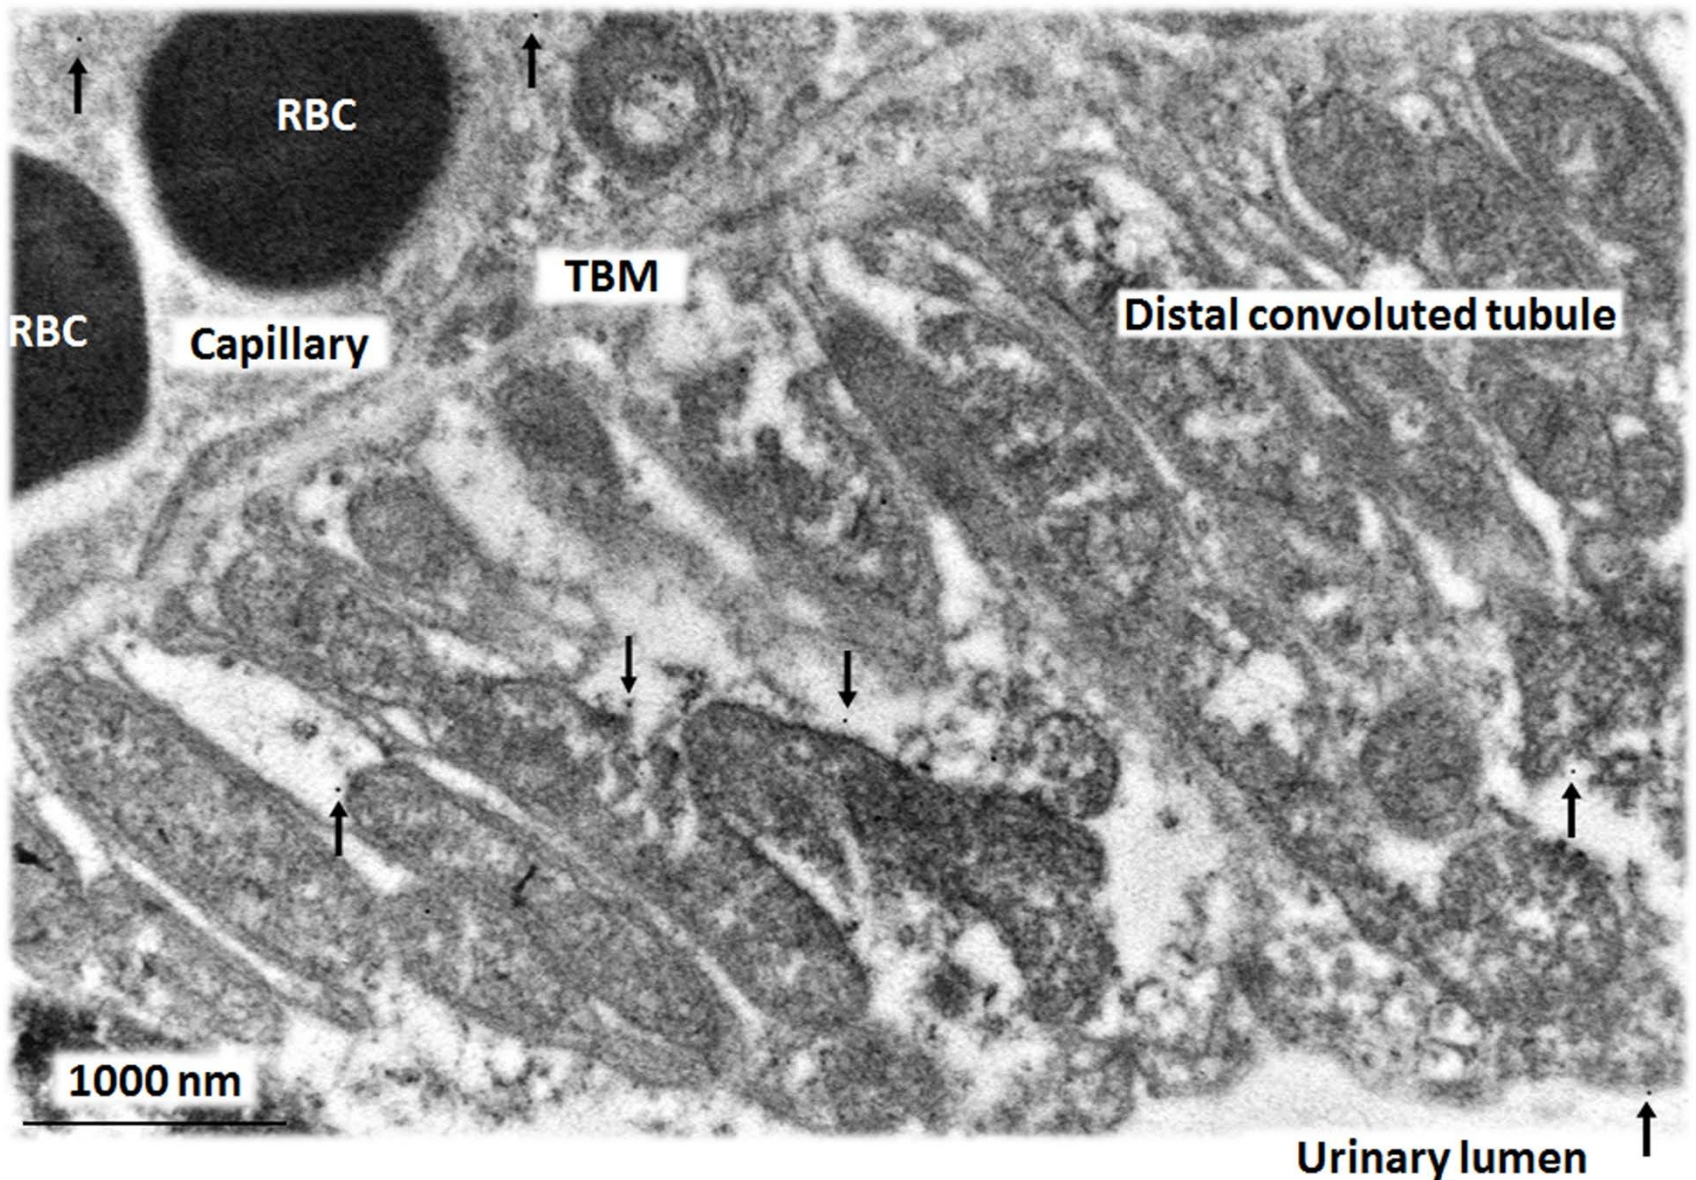

**Supplementary Figure 4. Representative electron micrograph of exogenous aKlotho in renal distal tubule.** aKlotho protein was intraperitoneally injected into homozygous aKlotho-deficient mice and the kidneys were harvested for immunogold electron microscopy. Arrows indicate gold particle (labelled aKlotho protein) in capillary lumen, cytosol and apical membrane of distal tubule. RBC: red blood cells; TBM: tubular basement membrane. Scale bar = 1000 nm.

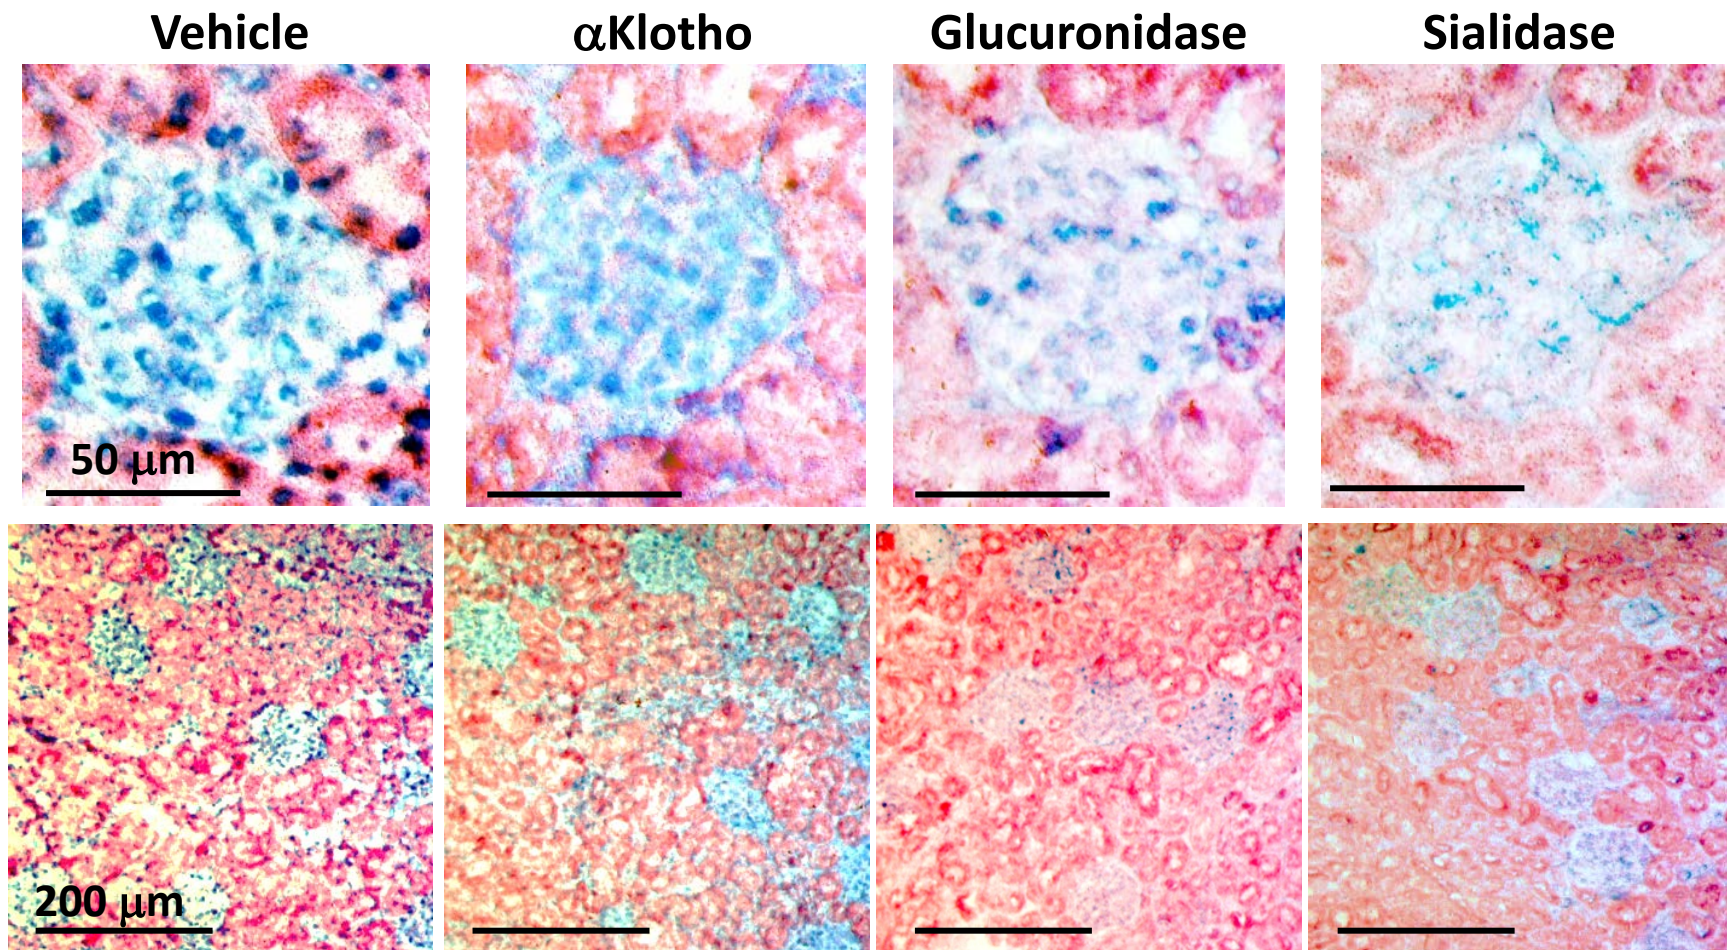

**Supplementary Figure 5.  $\alpha$ Klotho did not reduce glomerular negative charge.** The negative charge in glomeruli was evaluated by the Alcian blue stain<sup>1,2</sup> with Eosin as contrast stain.  $\alpha$ Klotho protein was added onto kidney cryosections and its effect was compared with that of glucuronidase (Sigma-Aldrich, St. Louis, MO) and sialidase (Sigma-Aldrich, St. Louis, MO). PBS was used as vehicle for control. **Upper panel:** representative photos at high magnification (Scale bar= 50  $\mu$ m); and **bottom panel:** representative photos with low magnification (Scale bar= 200  $\mu$ m).

### **Supplementary method for Alcian blue staining.**

The negative charge in glomeruli were evaluated by the Alcian blue stain and fast red nuclear stain<sup>1,2</sup>.

1. Kanwar YS.Carone FA Reversible changes of tubular cell and basement membrane in drug-induced renal cystic disease. *Kidney Int* 1984; 26(1):35-43.
2. Rollason TP.Brewer DB A study of glomerular basement membrane anionic sites and glomerular visceral epithelial cell coat in protein overload proteinuria in the rat. *J Pathol* 1984; 142(4):301-316.
